# Supplementary material for: A non-catalytic N-terminus domain of WRN prevents mitotic telomere deprotection
Source: PubMed Central journal article supplement (PMC9837040; doi:10.1038/s41598-023-27598-0), 2023-01-12

## **Supplementary Materials**

### **A non-catalytic N-terminus domain of WRN prevents mitotic telomere deprotection**

Diana Romero-Zamora<sup>1,2</sup>, Makoto T. Hayashi<sup>2,3\*</sup>

<sup>1</sup>Graduate School of Biostudies, Kyoto University, Yoshida-konoe, Sakyo, Kyoto, 606-8501 Japan; <sup>2</sup> IFOM-KU Joint Research Laboratory, Graduate School of Medicine, Kyoto University, Yoshida-konoe, Sakyo, Kyoto, 606-8501 Japan; <sup>3</sup>IFOM ETS, the AIRC Institute of Molecular Oncology, via Adamello 16, 20139 Milan, Italy

#### **Content:**

**Supplementary Figures S1, S2, S3, S4**

**Supplementary Tables S1, S2, S3**

**Supplementary Information, Original uncropped blotting images for Fig. 1, 2, 4, 5, S1, S2, S3**

**Supplementary File, AlphaFold2 program config, input sequence, and coordinate data**

**Figure S1**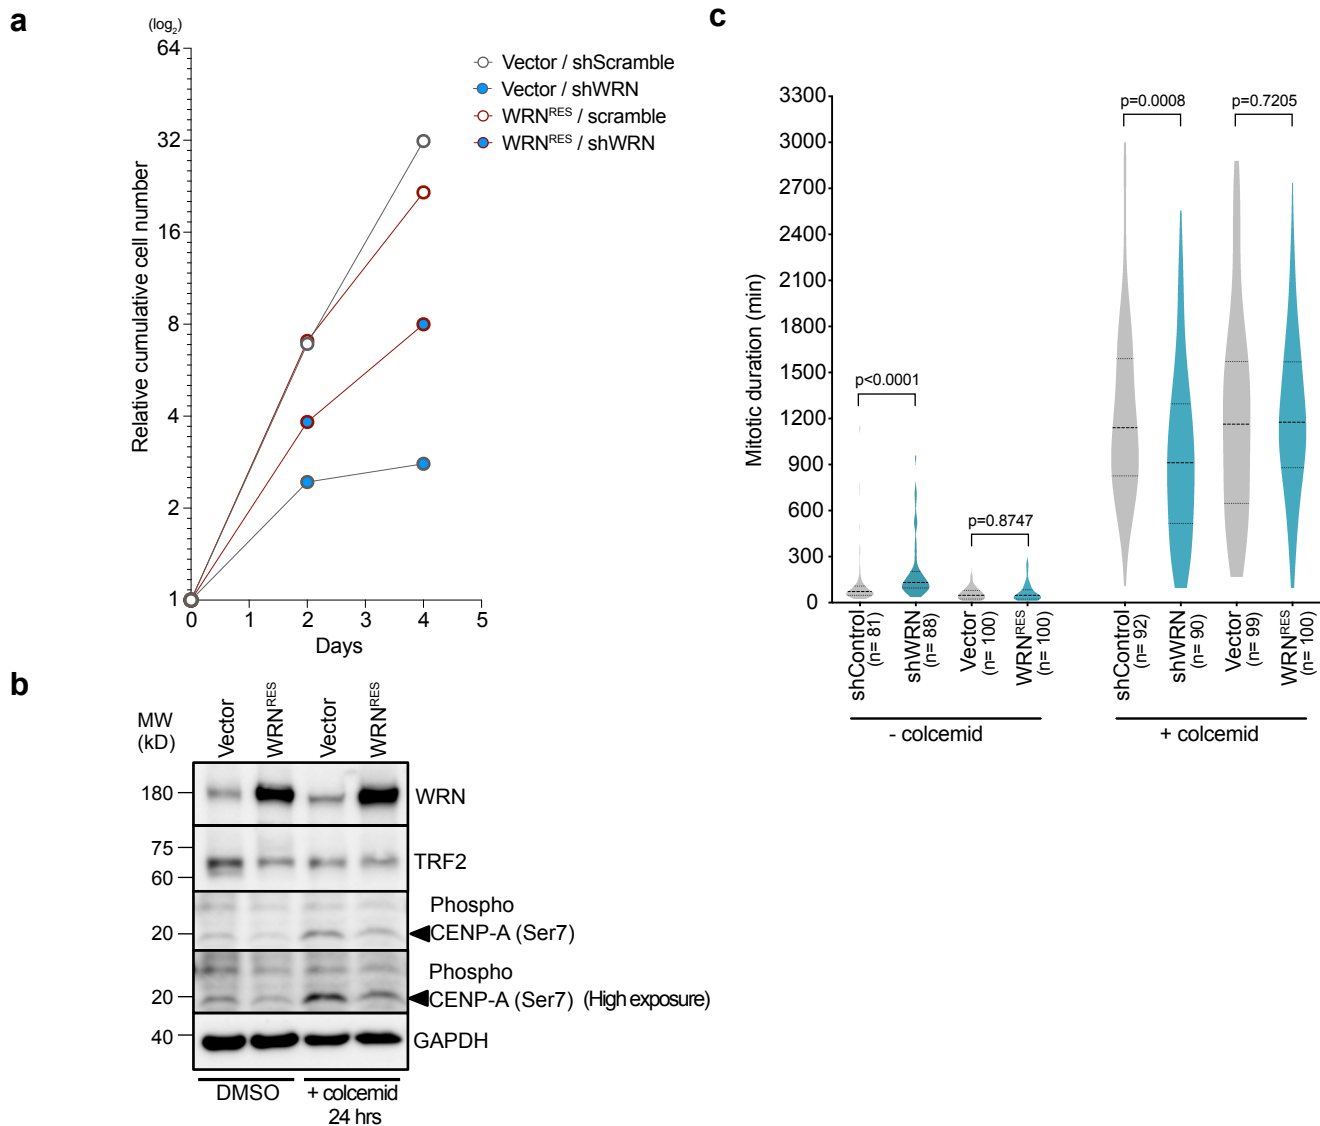

**Figure S1. WRN possesses suppressive effect on MAD-TIFs.** (a) Growth curve of IMR90 hTERT E6E7 cells infected with empty vector or a shRNA-resistant full-length WRN<sup>RES</sup>, followed by either shScramble or shWRN transduction. The same number of cells were seeded in 24-well plate at day 4 post-infection of shScramble and shWRN and cell number was analyzed at day 2 and 4. (b) Immunoblot of TRF2 in cells expressing exogenous WRN after 24 hrs exposure to 100 ng/ml colcemid. Phospho CENP-A (Ser7) and GAPDH serves as a mitotic marker and a loading control, respectively. (c) Distribution of mitotic duration in cells expressing shWRN and WRN<sup>RES</sup> (Median, 25th and 75th percentile; Mann-Whitney test). Cells were either mock-treated or exposed to 100 ng/ml colcemid and analyzed by live-cell imaging.

**Figure S2**

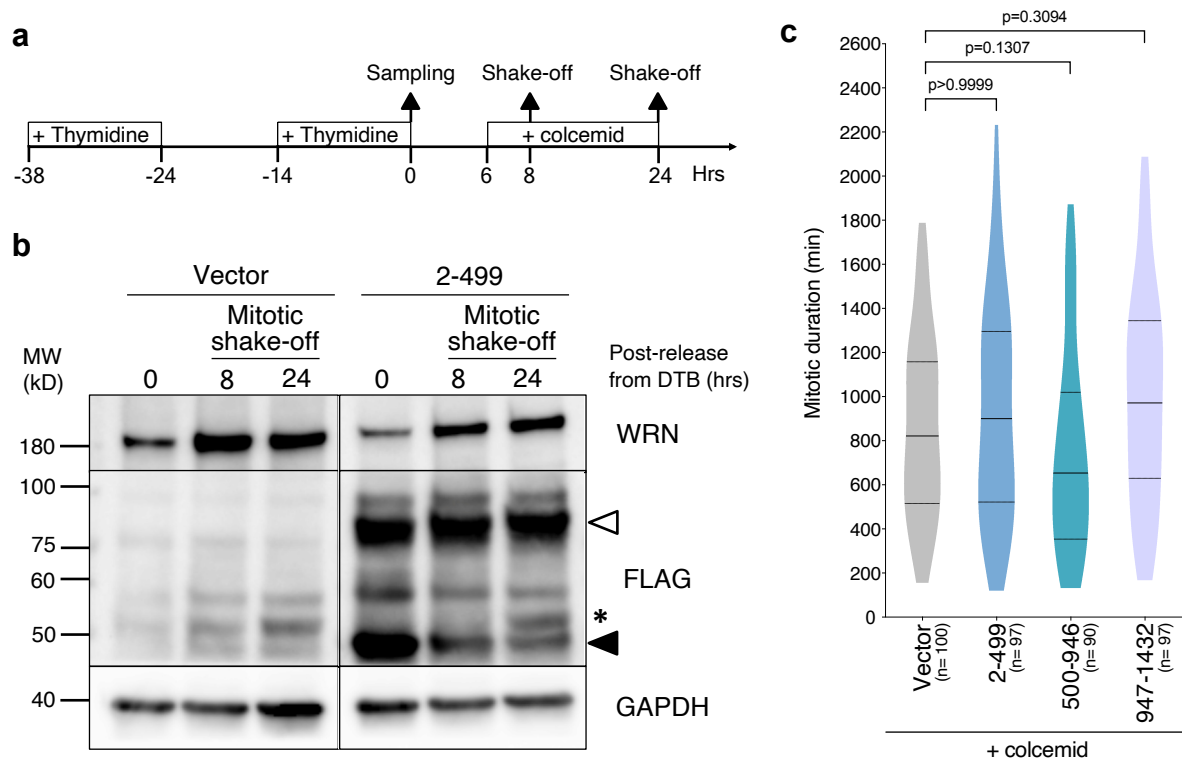

**Figure S2. WRN N-terminus is modified upon colcemid treatment without affecting mitotic duration.** (a) Schematic of the double-thymidine block. Samples for Western blotting were collected at 0, 8, and 24 hrs post the second release. Mitotic cells were collected by shake-off at 8 and 24 hrs. (b) Immunoblot of endogenous WRN and the NLS-4FL-WRN2-499 fragment. The expected band size is indicated by a black arrowhead, and potential complex formation or protein modifications are indicated by a white arrowhead. Asterisk denotes unspecific bands. (c) Distribution of mitotic duration in cells expressing the indicated WRN fragments (median, 25th, and 75th percentile; Kruskal-Wallis followed by Dunn's test). Cells were treated with 100 ng/mL colcemid and analyzed by live-cell imaging.

**Figure S3**

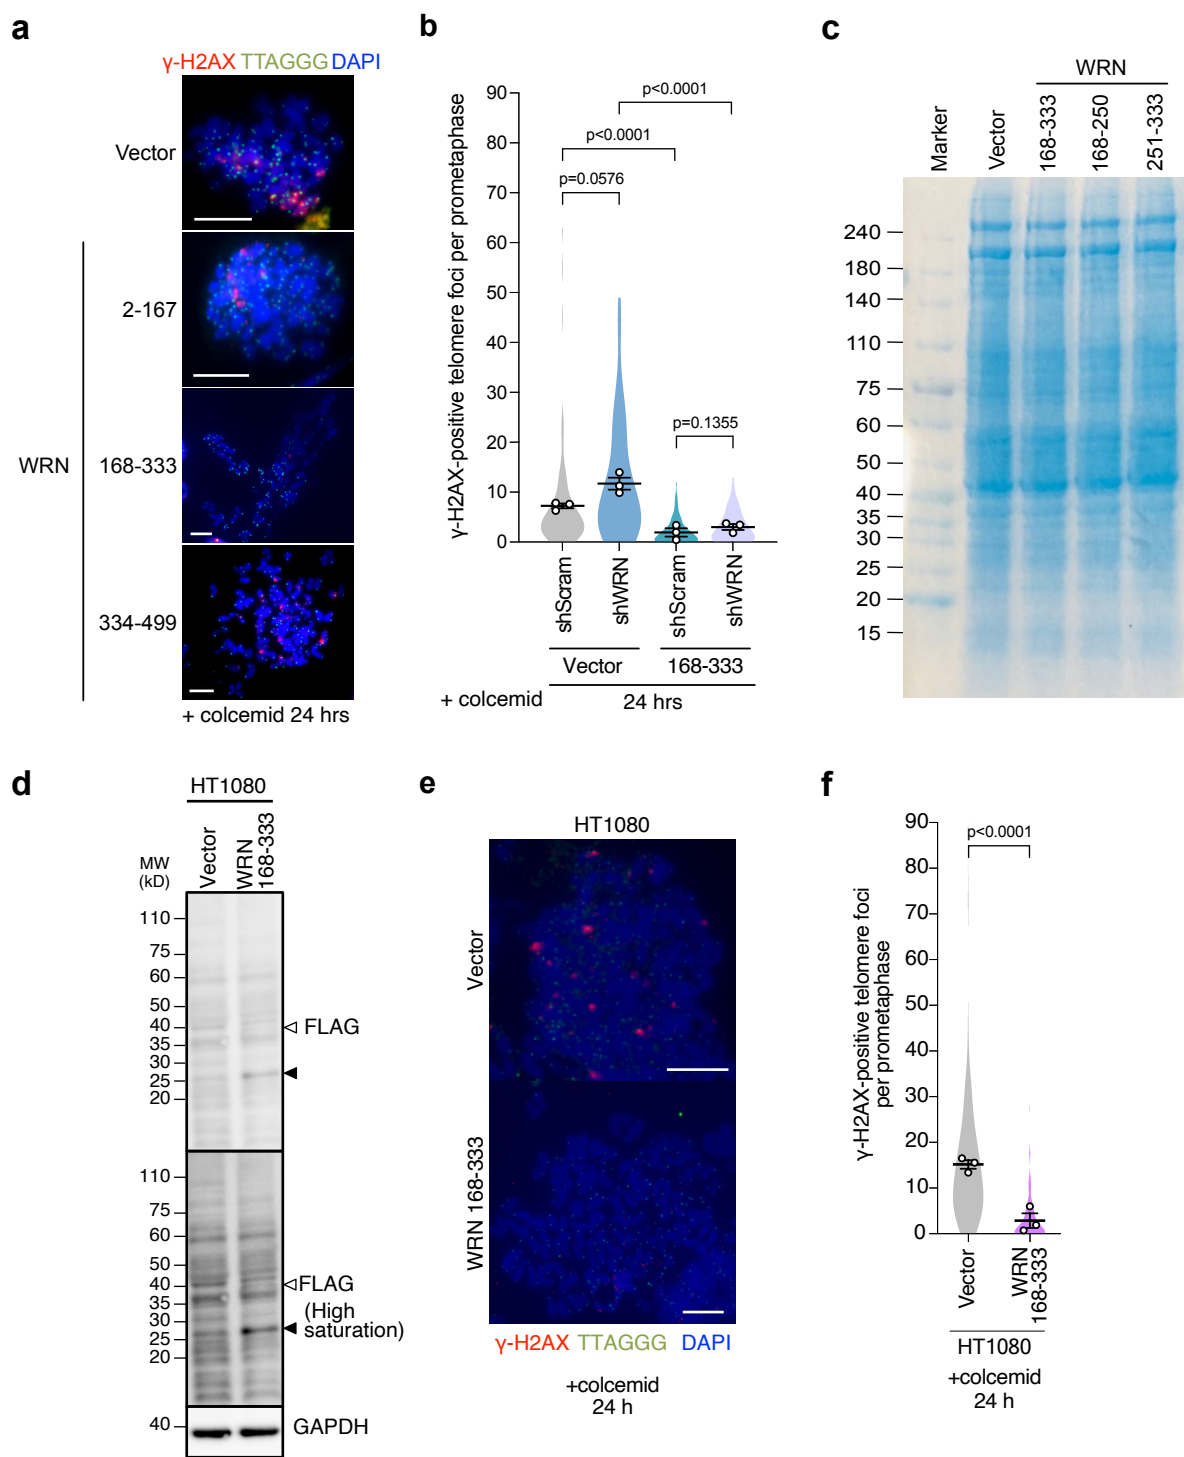

**Figure S3. The WRN<sup>168-333</sup> fragment containing a coiled-coil suppresses MAD-TIFs.**

(a) Representative images of meta-TIF assay from cells expressing indicated WRN fragments after treatment with 100 ng/ml colcemid for 24 hrs, related to Fig. 2d and e. Scale bar, 10  $\mu$ m. (b) Quantification of telomeric signals colocalized with  $\gamma$ -H2AX foci in the indicated conditions as shown in Fig. 1c (n=30/experiment; mean  $\pm$  s.e.m.; Kruskal-Wallis followed by Dunn's test). (c) Representative SDS-PAGE gel stained with Coomassie Brilliant Blue (CBB) that corresponds to the blot in Fig. 2f. (d) Immunoblot of FLAG and GAPDH in NLS-4FL-WRN<sup>168-333</sup> expressing HT1080 cells. Black and white arrow heads indicate expected size and potentially modified fragment, respectively. (e) Representative images of meta-TIF assay in HT1080 cells expressing NLS-4FL-WRN<sup>168-333</sup> fragment after treatment with 100 ng/ml colcemid for 24 hrs. The images show DAPI (blue),  $\gamma$ -H2AX (red), and telomere FISH (green). Scale bar, 10  $\mu$ m. (f) Quantification of telomeric signals colocalized with  $\gamma$ -H2AX foci per chromosome spread in NLS-4FL-WRN<sup>168-333</sup> expressing HT1080 cells as shown in Fig. 1c (n=30/experiment; mean  $\pm$  s.e.m.; Mann Whitney test).

**Figure S4**

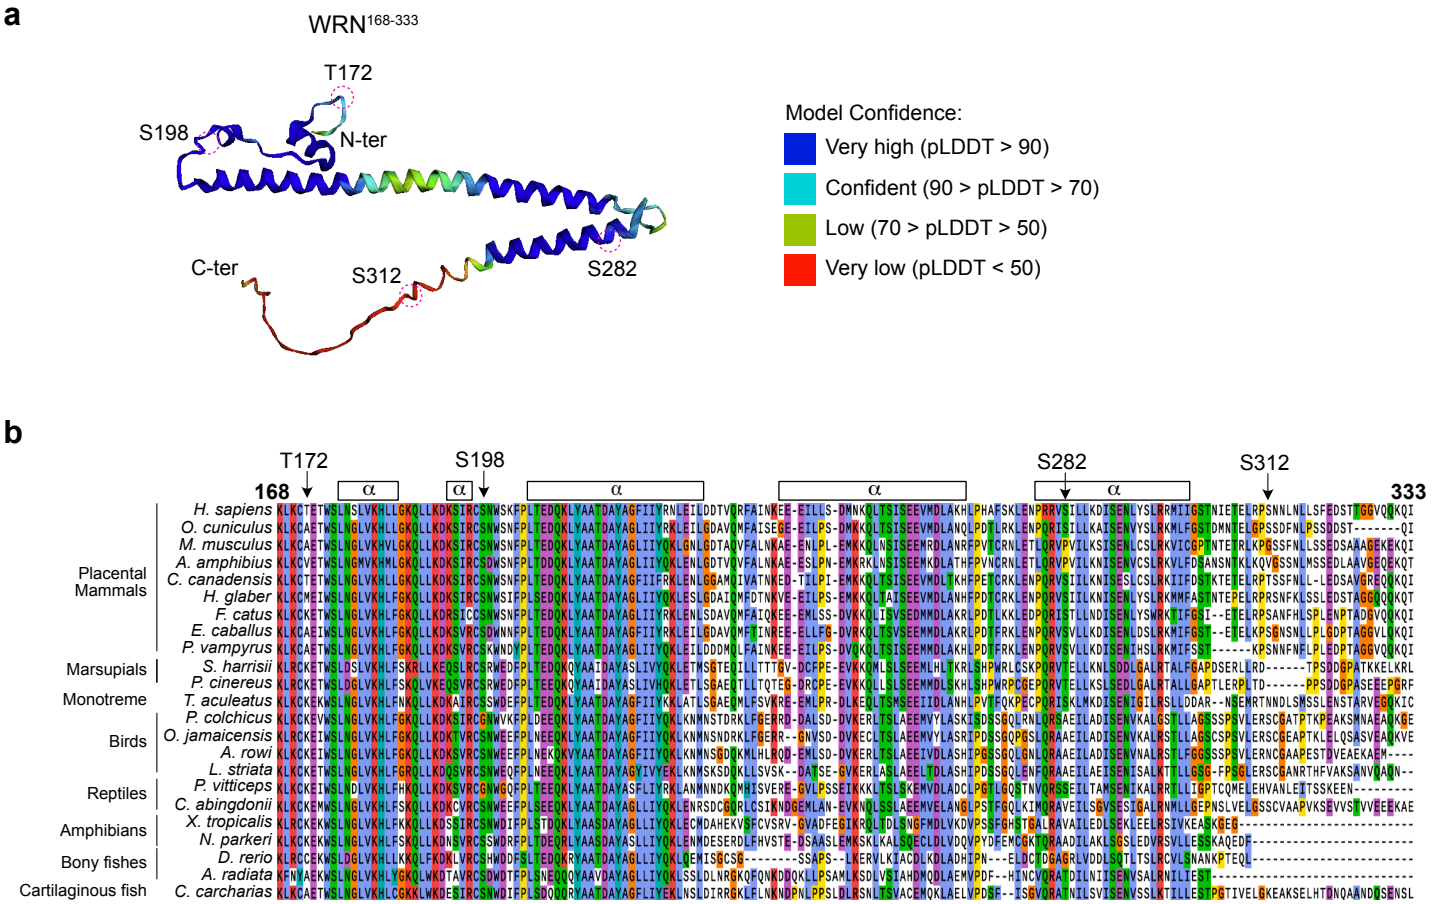

**Figure S4. Predicted structure of WRN<sup>168-333</sup> and alignment of the protein sequence among vertebrate species. (a)** A representative structure of the WRN<sup>168-333</sup> fragment with a color-coded confidence per-residue (pLDDT) predicted by the AlphaFold2 pipeline. Potential Aurora B target sites are indicated by dashed magenta circles. **(b)** Sequence alignments of human WRN 168-333 aa region with WRN homologs in vertebrate species. Positions of the predicted alpha-helices in **a** are shown above. Arrows indicate putative AURKB phosphorylation sites in the human WRN fragment.

**Table S1.** Summary of WRN fragments size and phenotypes.

| Name                      | Expected size including NLS-4FL (kD) | Observed band size | MAD-TIF suppression  |
|---------------------------|--------------------------------------|--------------------|----------------------|
| WRN <sup>RES</sup>        | ~180                                 | ~180               | <b>YES</b>           |
| WRN <sup>2-499</sup>      | ~69                                  | ~48, ~80           | <b>YES</b>           |
| WRN <sup>500-946</sup>    | ~62                                  | ~62, ~70           | <b>NO</b>            |
| WRN <sup>947-1432</sup>   | ~67                                  | ~27, ~63, ~74      | <b>NO</b>            |
| WRN <sup>2-167</sup>      | ~27                                  | ~23, ~27           | <b>NO</b>            |
| WRN <sup>168-333</sup>    | ~27                                  | ~23, ~26, ~38      | <b>YES</b>           |
| WRN <sup>334-499</sup>    | ~27                                  | ~23, ~62           | <b>NO</b>            |
| WRN <sup>168-250</sup>    | ~17                                  | Not expressed      | <b>NO</b>            |
| WRN <sup>251-333</sup>    | ~17                                  | ~33                | <b>YES</b> (partial) |
| WRN <sup>168-333-1A</sup> | ~27                                  | ~23, ~26, ~38      | <b>YES</b>           |
| WRN <sup>168-333-4A</sup> | ~27                                  | ~23, ~26, ~38      | <b>YES</b>           |
| WRN <sup>168-333-1D</sup> | ~27                                  | ~26, ~38           | <b>NO</b>            |
| WRN <sup>168-333-1E</sup> | ~27                                  | ~26, ~38           | <b>NO</b>            |
| WRN <sup>168-333-4D</sup> | ~27                                  | ~26, ~38           | <b>NO</b>            |

Table S2. List of plasmids used in this study

| Plasmid code (pMTH) | Name                                   | Source                   |
|---------------------|----------------------------------------|--------------------------|
| 127                 | pLKO.1-shScramble                      | Addgene # 1864           |
| 218                 | pLKO.1-shWRN-2 (TRCN0000004902)        | Jan Karlseder laboratory |
| 285                 | pLKO.1-shTRF2-F (TRCN0000004811)       | Jan Karlseder laboratory |
| 420                 | pLenti-blaR-p2a                        | This study               |
| 426                 | pLenti-blaR-p2a-hWRN_RshRNA            | This study               |
| 427                 | pLenti-blaR-p2a-hWRN-E84A_RshRNA       | This study               |
| 428                 | pLenti-blaR-p2a-hWRN-K577M_RshRNA      | This study               |
| 688                 | psPAX2                                 | Addgene # 12260          |
| 689                 | pCMV-VSV-G                             | Addgene # 8454           |
| 911                 | pLenti-bla-p2a-TRF2                    | This study               |
| 1174                | pLenti-bla-p2a-NLS-4FL-WRN(2-499)      | This study               |
| 1191                | pLenti-bla-p2a-NLS-4FL-WRN(500-946)    | This study               |
| 1195                | pLenti-bla-p2a-NLS-4FL-WRN(947-1432)   | This study               |
| 1236                | pLenti-bla-p2a-NLS-4FL-WRN(2-167)      | This study               |
| 1241                | pLenti-bla-p2a-NLS-4FL-WRN(168-333)    | This study               |
| 1242                | pLenti-bla-p2a-NLS-4FL-WRN(334-499)    | This study               |
| 1303                | pLenti-bla-p2a-NLS-4FL-WRN(168-250)    | This study               |
| 1304                | pLenti-bla-p2a-NLS-4FL-WRN(251-333)    | This study               |
| 1321                | pLenti-bla-p2a-NLS-4FL-WRN(168-333)-4A | This study               |
| 1322                | pLenti-bla-p2a-NLS-4FL-WRN(168-333)-1A | This study               |
| 1351                | pLenti-bla-p2a-NLS-4FL-WRN(168-333)-1D | This study               |
| 1352                | pLenti-bla-p2a-NLS-4FL-WRN(168-333)-1E | This study               |
| 1353                | pLenti-bla-p2a-NLS-4FL-WRN(168-333)-4D | This study               |

Table S3. Accession numbers of WRN used in this study

| Organism                   | Accession Number |
|----------------------------|------------------|
| Homo Sapience              | XP_011542941.1   |
| Oryctolagus cuniculus      | XP_017194550.1   |
| Mus musculus               | XP_017168151.1   |
| Arvicola amphibius         | XP_038181556.1   |
| Castor canadensis          | XP_020036300.1   |
| Heterocephalus glaber      | XP_021092503.1   |
| Felis catus                | XP_044911276.1   |
| Equus caballus             | XP_023486363.1   |
| Pteropus vampyrus          | XP_011371577.1   |
| Sarcophilus harrisii       | XP_023361414.1   |
| Phascolarctos cinereus     | XP_020863957.1   |
| Tachyglossus aculeatus     | XP_038602619.1   |
| Phasianus colchicus        | XP_031463388.1   |
| Oxyura jamaicensis         | XP_035181081.1   |
| Apteryx rowi               | XP_025947442.1   |
| Lonchura striata domestica | XP_021387255.1   |
| Pogona vitticeps           | XP_020664644.1   |
| Chelonoidis abingdonii     | XP_032625369.1   |
| Xenopus tropicalis         | XP_031760210.1   |
| Nanorana parkeri           | XP_018426138.1   |
| Danio rerio                | XP_021334923.1   |
| Amblyraja radiata          | XP_032877913.1   |
| Carcharodon carcharias     | XP_041033343.1   |



Supplementary Information for Fig. 1

Figure 1a

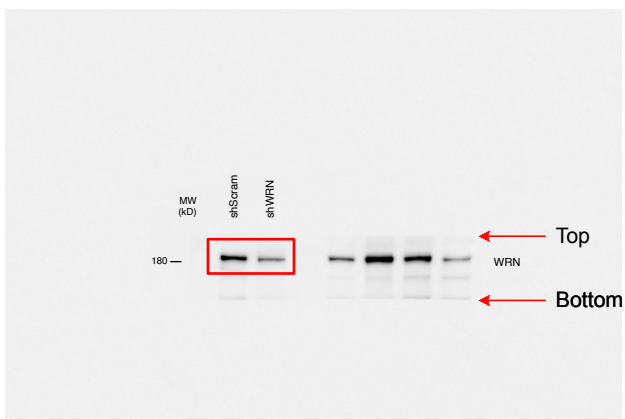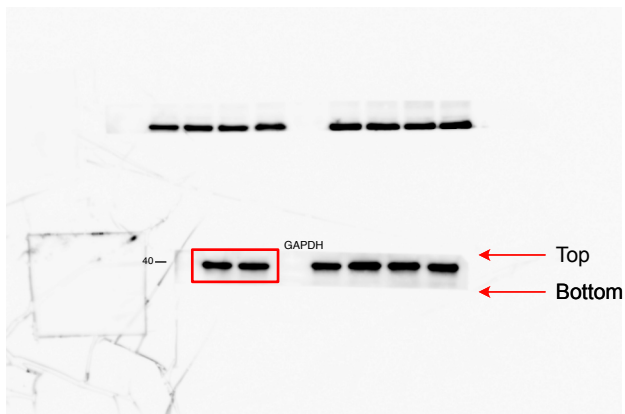

Figure 1f

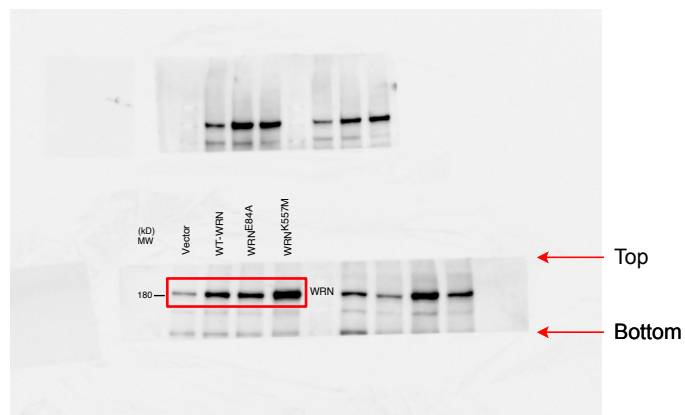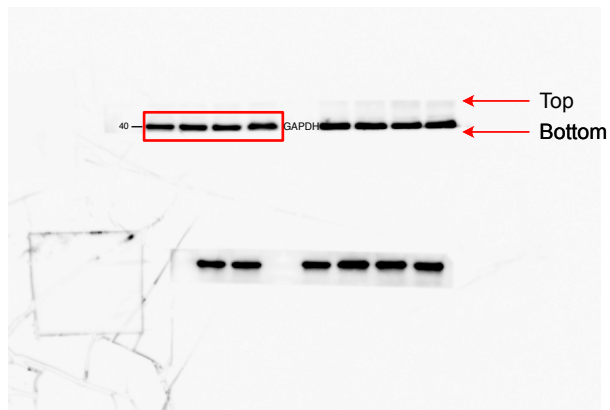

Figure 1d

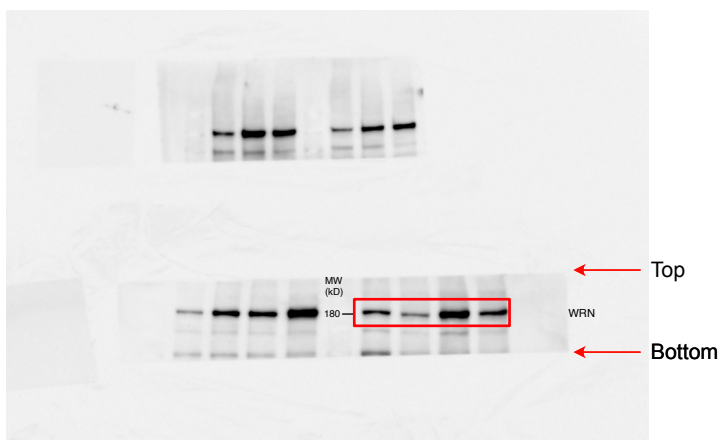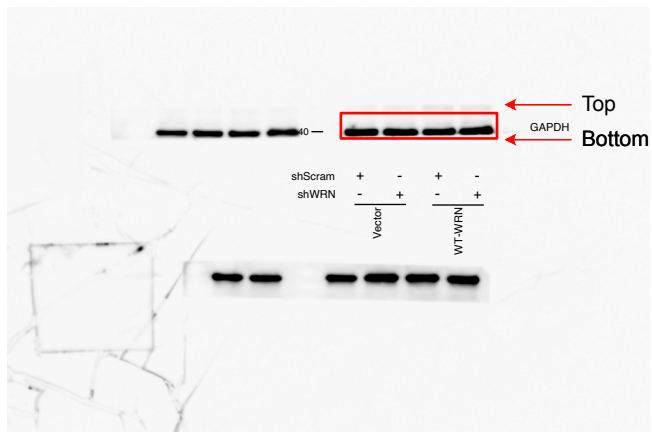

Figure 2b

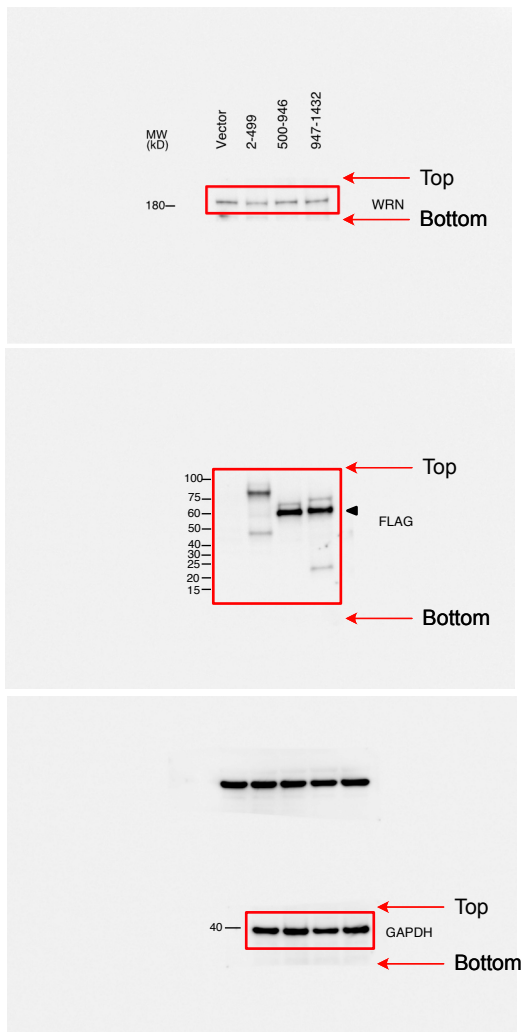

Figure 2f

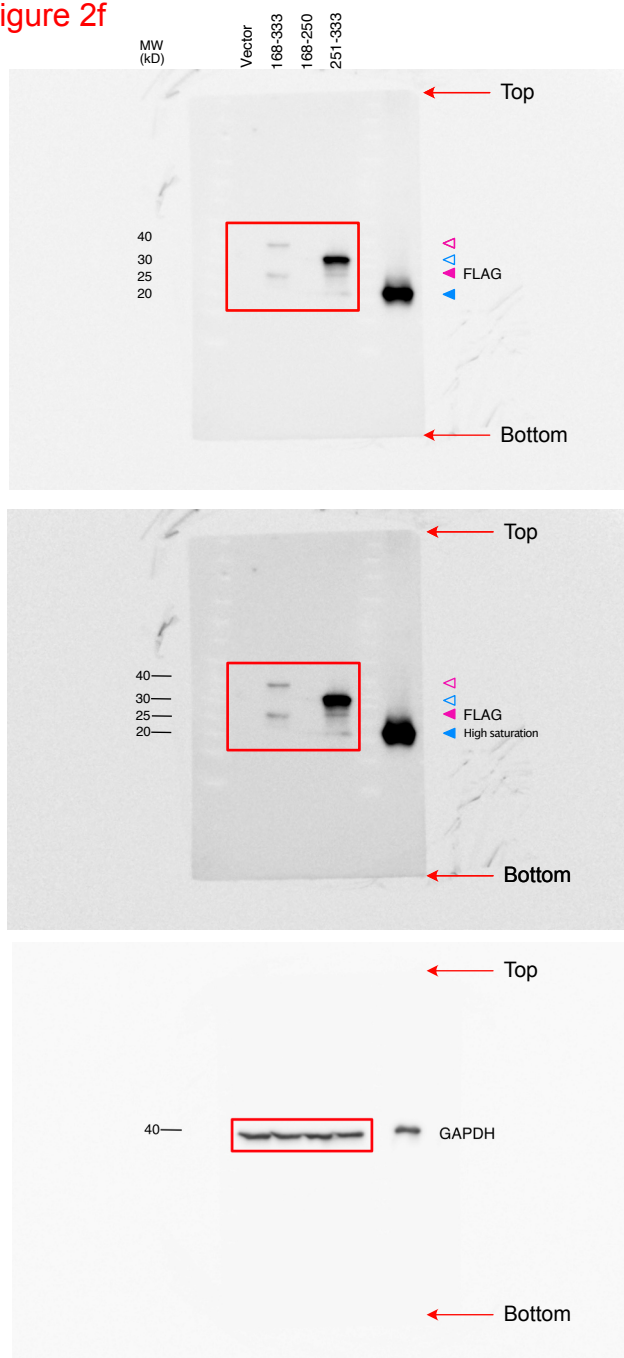

Figure 2d

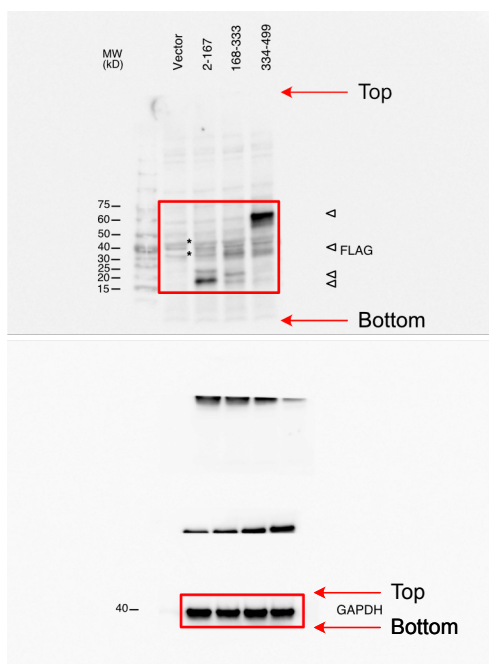

Figure 4a

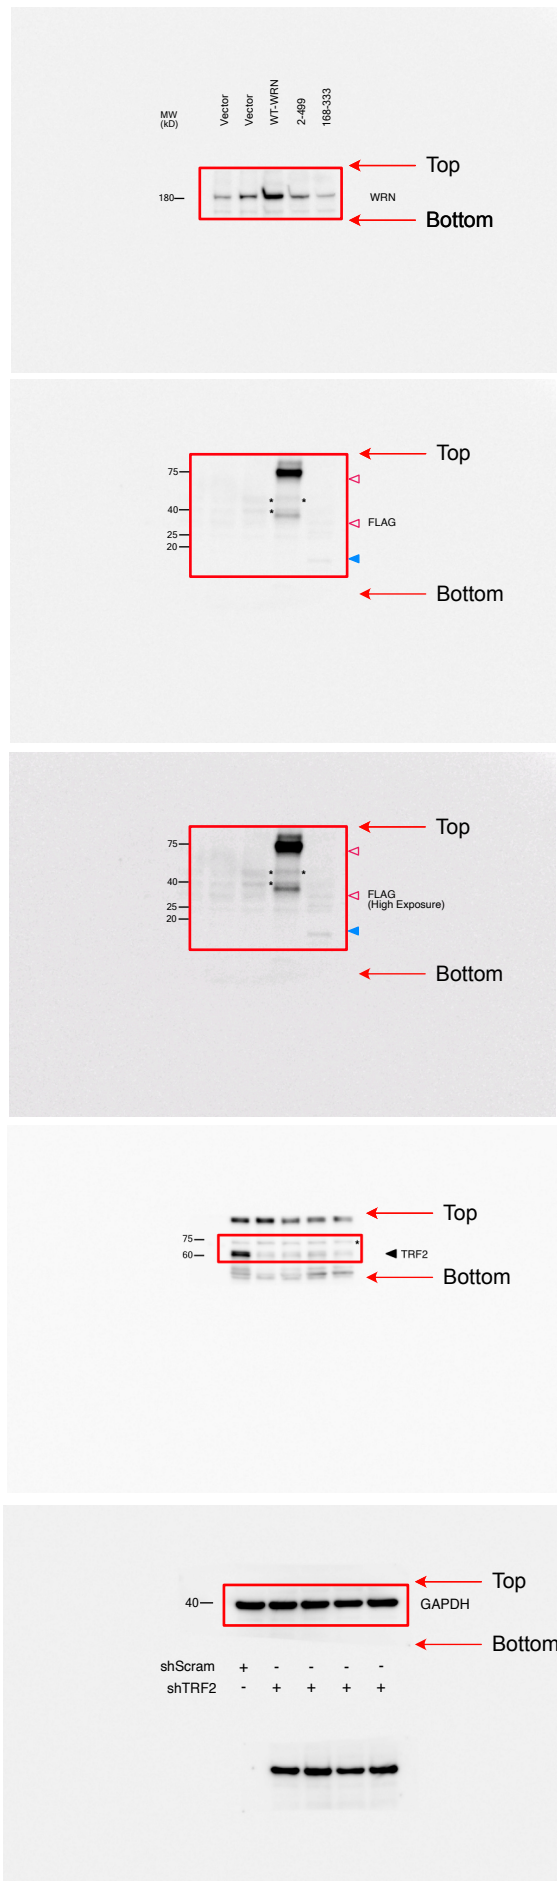

Figure 4d

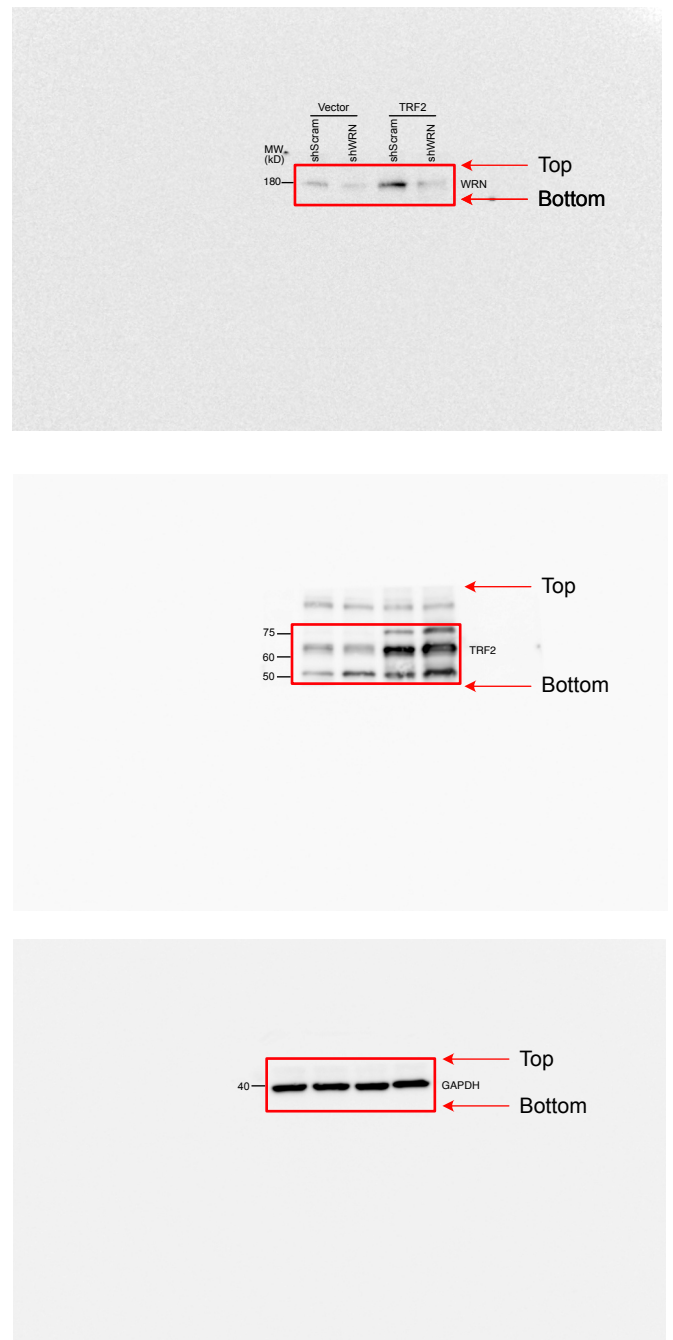

Figure 5b

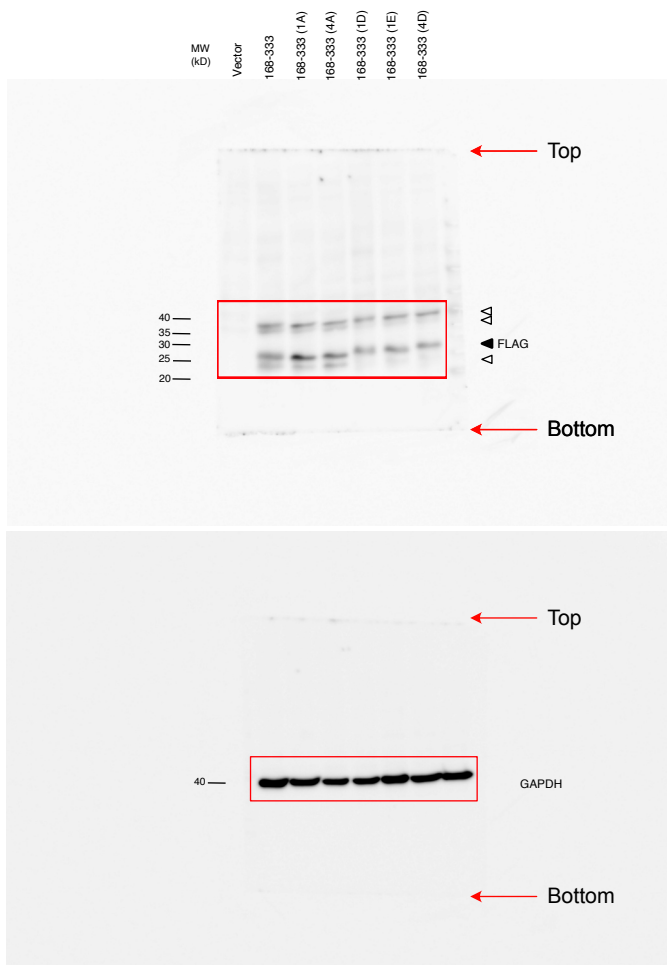

Figure S1b

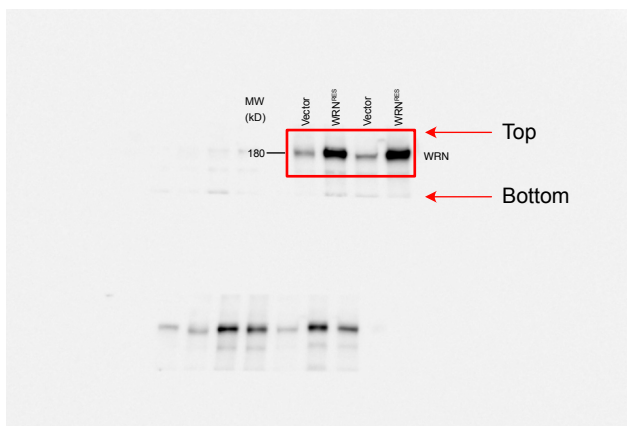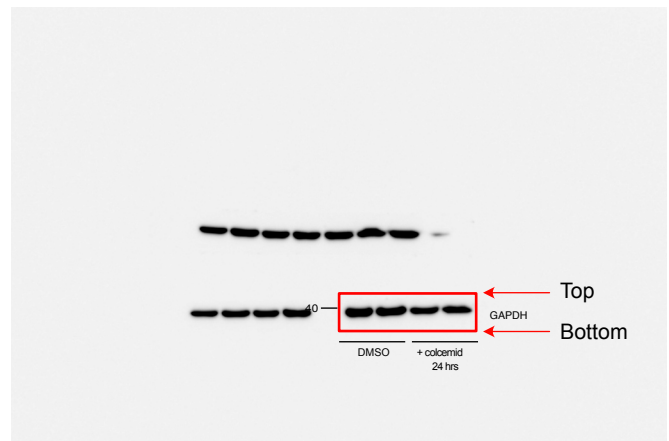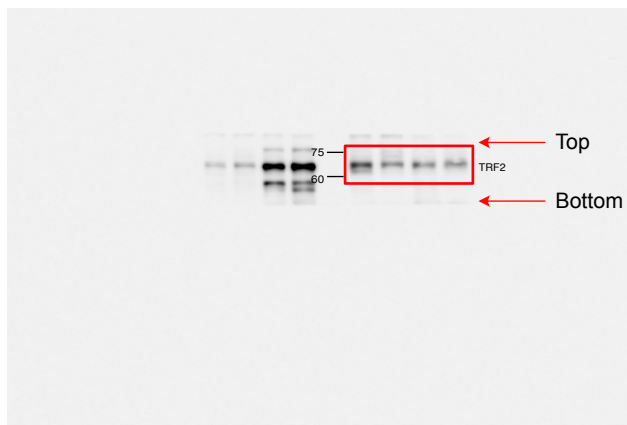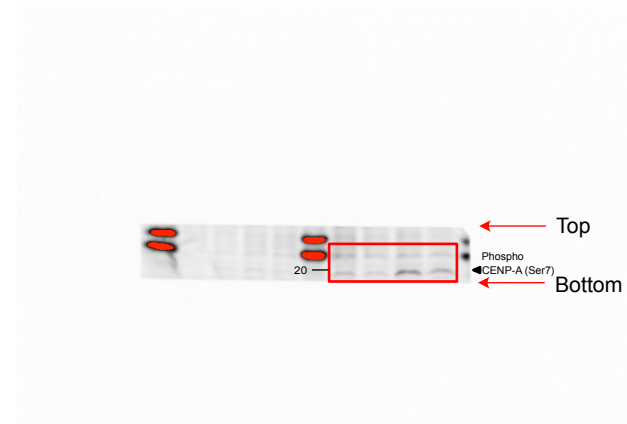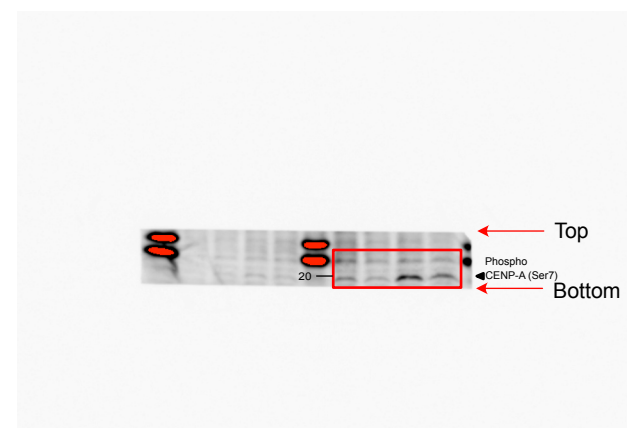

Supplementary Information for Fig. S2

Figure S2b

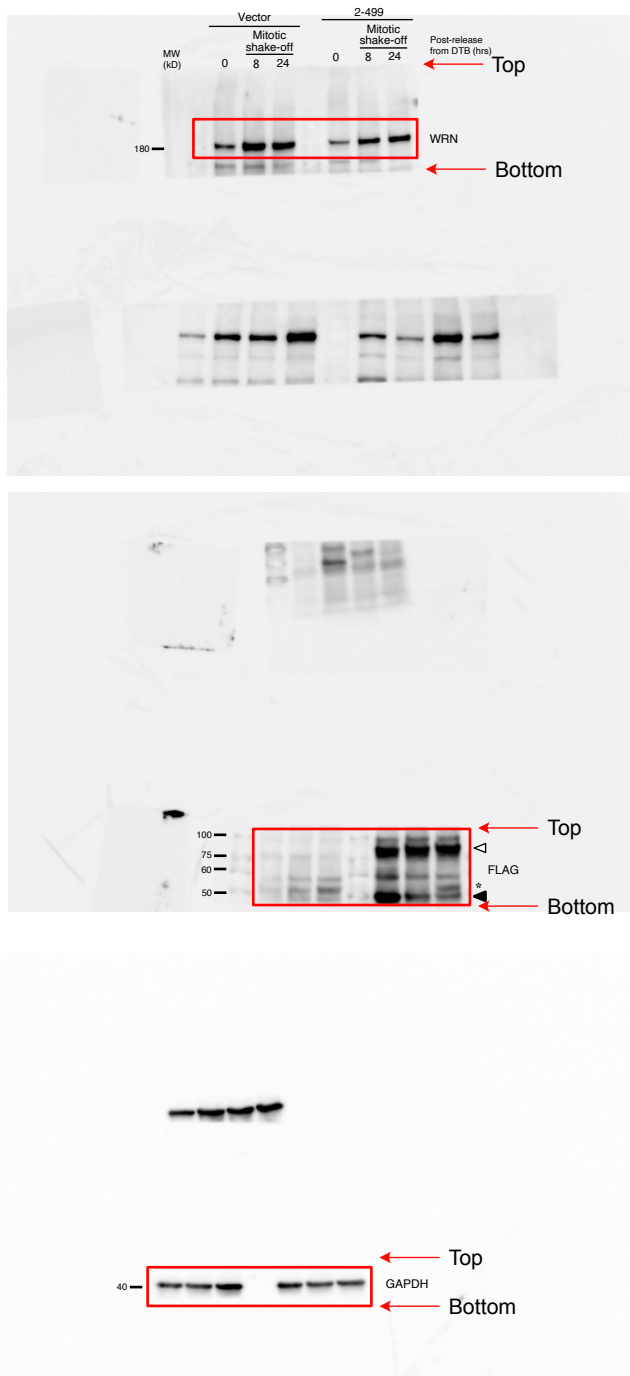



Figure S3d

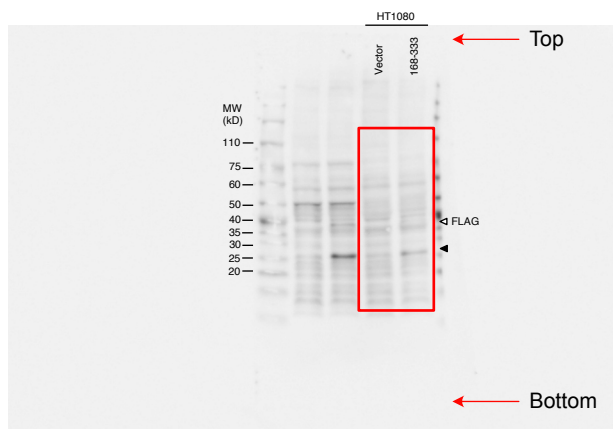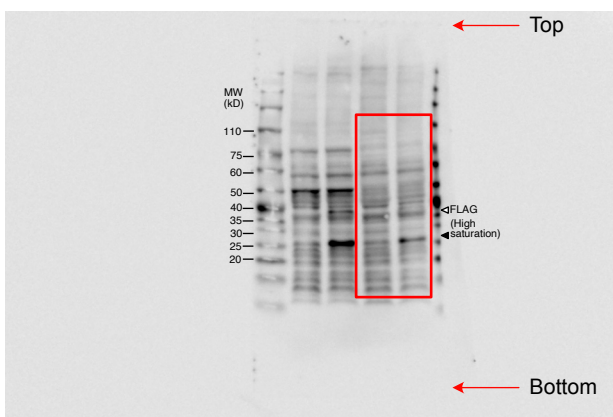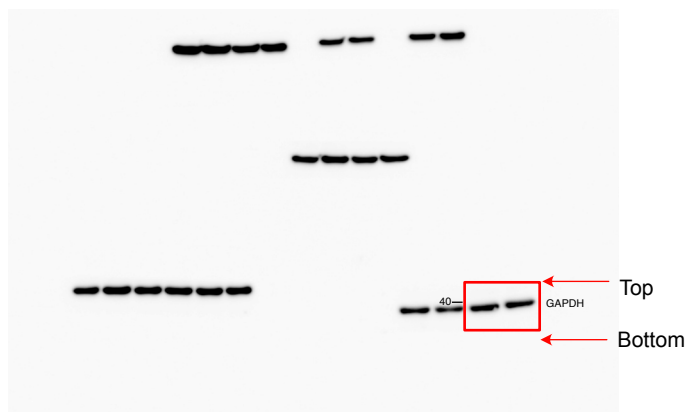

## Supplementary File, related to AlphaFold2 analysis

Program config:

```
{
  "num_queries": 1,
  "use_templates": false,
  "use_amber": false,
  "msa_mode": "MMseqs2 (UniRef+Environmental)",
  "model_type": "AlphaFold2-ptm",
  "num_models": 5,
  "num_recycles": 3,
  "num_ensemble": 1,
  "model_order": [
    1,
    2,
    3,
    4,
    5
  ],
  "keep_existing_results": false,
  "rank_by": "plddt",
  "pair_mode": "unpaired+paired",
  "host_url": "https://api.colabfold.com",
  "stop_at_score": 100.0,
  "stop_at_score_below": 0,
  "recompile_padding": 1.0,
  "recompile_all_models": false,
  "commit": "9d4b35139f2a062b2eb8f8f9624eaaa703541dda",
  "is_training": false,
  "version": "1.3.0"
}
```

Input sequence

```
KLKCTETWSLNSLVKHLGKQLLKDKSIRCSNWSKFPLTEDQKLYAATDAYAGFIYRNLE
ILDDTVQRFAINKEEEILLSDMNKQLTSISEEVMDLAKHLPHAFSKLENPRRVSILLKDISE
NLYSLRRMIIGSTNIETELRPSNNLNLNLLSFEDSTTGGVQQKQI
```

coverage

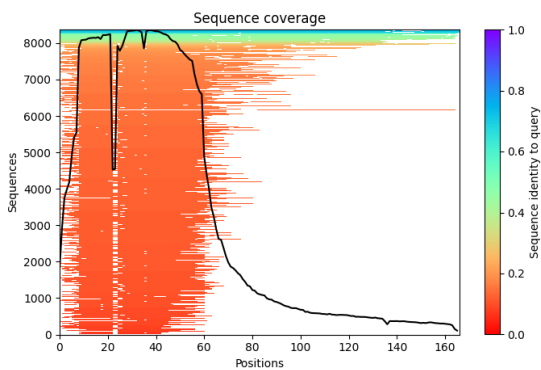

plddt

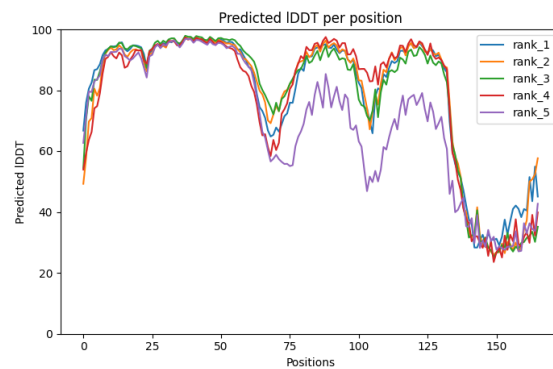

PAE

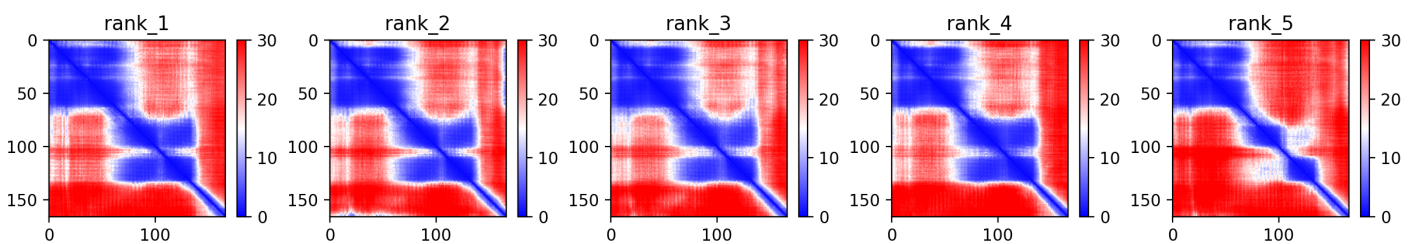

Supplement: 41598_2023_27598_MOESM1_ESM.pdf [file 41598_2023_27598_MOESM1_ESM.pdf]
